# Supplementary material
Source: PubMed Central journal article supplement (PMC4771340)
Supplement: IAI.01229-15_zii999091608so1.pdf [file IAI.01229-15_zii999091608so1.pdf]

**Table S1. Primers.**

| <b>Primer name</b>                                                                | <b>Sequence 5'-3'</b>    |
|-----------------------------------------------------------------------------------|--------------------------|
| SNP_586018 F ( <i>glxK</i> )                                                      | ATTGAGATTGTACTGCGGGCG    |
| SNP_586018 R                                                                      | GAAAGATTGCAACCGCGACG     |
| SNP_1633365 F (prophage)                                                          | ATCAGAGGACATTTTCAGGAGGTG |
| SNP_1633365 R                                                                     | GGCATTCCGGGCATTTTCAG     |
| SNP_3316686 F (prophage)                                                          | CAGCTGGCAAGCGAATGTAA     |
| SNP_3316686 R                                                                     | ACAGTATCAAGGTGAGTGAGATG  |
| SNP_3678749 F ( <i>metK</i> )                                                     | GTCCGTCTCTGAAGGGCATC     |
| SNP_3678749 R                                                                     | CCGTCGTCATACTGGAAAGTCA   |
| SNP_3892698 F ( <i>fadH</i> )                                                     | CAGCTACCAACCGCATCTGG     |
| SNP_3892698 R                                                                     | TGCGCGTGACCCAAGTAAAT     |
| SNP pO111_3 F                                                                     | CTTCTTTTTCTGCGCTCTG      |
| SNP pO111_3 R                                                                     | CCGTATCTCCCCGTCTGTT      |
| 95NR1 contig213000000 F (unique sequence of Stx2 phage 3)                         | ACGATCGTTTCTTGGGTCTTGA   |
| 95NR1 contig213000000 R (hypothetical protein encoded at the end of Stx2 phage 2) | TGATGCCGTATGCAGACCAG     |
| Tail fiber F                                                                      | GTTCGCATAGGGCAGATTACGC   |
| Phage R                                                                           | ATGAGTACCGCTGGCATTTCG    |
| Stx2 phage 1 cI F                                                                 | TTGGCGTCTTCCAGTTGCTCAG   |
| Stx 2 phage 2 cI F                                                                | TCAAGACCAGCTTCTTTACAGGC  |
| Stx2 phage 3 cI F                                                                 | ATTCAACCATCTTGCGAGATCCG  |
| Stx2A R                                                                           | ACCCAGTAACAGGCACAGTACC   |

**Table S2. Prophages and phages used to construct the end sequence profiling index.**

| <b>Prophage/Phage</b>                                  | <b>Genbank Accession</b>   | <b>Reference</b> |
|--------------------------------------------------------|----------------------------|------------------|
| ECO111_P01 –<br>ECO111_P16 of O111:H-<br>11128         | <a href="#">AP010960.1</a> | (6)              |
| ECO103_P04 of O103:H2<br>12009                         | <a href="#">AP010958.1</a> | (6)              |
| ECO103_P12 of O103:H2<br>12009                         | <a href="#">AP010958.1</a> | (6)              |
| ECO103_P14 of O103:H2<br>12009                         | <a href="#">AP010958.1</a> | (6)              |
| ECO26_P14 of O26:H11<br>11368                          | <a href="#">AP010953.1</a> | (6)              |
| Sp18 of O157:H7 Sakai                                  | <a href="#">BA000007.2</a> | (2)              |
| CRP49 of <i>Citrobacter</i><br><i>rodentium</i> ICC168 | <a href="#">FN543502.1</a> | (7)              |
| Bacteriophage Mu                                       | <a href="#">AF083977.1</a> | (5)              |
| <i>Escherichia</i> phage TL-2011a                      | <a href="#">JQ011316.1</a> | (4)              |
| Stx2-converting phage 86                               | <a href="#">AB255436.1</a> | N/A              |
| Stx2-converting<br>phagevB_EcoP_24B                    | <a href="#">HM208303.1</a> | (9)              |
| Bacteriophage Min27                                    | <a href="#">EU311208.1</a> | (10)             |
| <i>Escherichia</i> phage TL-2011c                      | <a href="#">JQ011318.1</a> | (4)              |
| Bacteriophage VT2phi_272                               | <a href="#">HQ424691.1</a> | N/A              |
| Stx2-converting phage 1717                             | <a href="#">FJ188381.1</a> | N/A              |
| Phage YYZ-2008                                         | <a href="#">FJ184280.1</a> | N/A              |
| Phage JLK-2012                                         | <a href="#">JQ347801.1</a> | (3)              |
| Stx2-converting phage II                               | <a href="#">AP005154.1</a> | (8)              |
| Phage BP-4795                                          | <a href="#">AJ556162.1</a> | (1)              |
| nt 1245044-1317701 of<br>O157:H7 Xuzhou21              | <a href="#">CP001925.1</a> | (11)             |

**Table S3. *E. coli* genomes used in phylogenetic tree construction.**

| <b>Accession</b> | <b>GI</b> | <b>Strain</b>                                    | <b>Pathovar</b>    |
|------------------|-----------|--------------------------------------------------|--------------------|
| NC_008563        | 117622295 | <i>Escherichia coli</i> APEC O1                  | APEC               |
| NC_010468        | 170018061 | <i>Escherichia coli</i> ATCC 8739                | Laboratory         |
| NC_012967        | 254160123 | <i>Escherichia coli</i> B str. REL606            | Laboratory         |
| NC_010498        | 170679574 | <i>Escherichia coli</i> SMS-3-5                  | Environmental      |
| NC_010473        | 170079663 | <i>Escherichia coli</i> str. K12 substr. DH10B   | Laboratory         |
| NC_011353        | 209395693 | <i>Escherichia coli</i> O157:H7 str. EC4115      | EHEC               |
| NC_013008        | 254791136 | <i>Escherichia coli</i> O157:H7 str. TW14359     | EHEC               |
| NC_012947        | 253771435 | <i>Escherichia coli</i> 'BL21-Gold(DE3)pLysS AG' | Laboratory         |
| NC_011601        | 215485161 | <i>Escherichia coli</i> O127:H6 E2348/69         | EPEC               |
| NC_011741        | 218552585 | <i>Escherichia coli</i> IAI1                     | Commensal          |
| NC_011745        | 218687878 | <i>Escherichia coli</i> ED1a                     | Commensal          |
| NC_011750        | 218698419 | <i>Escherichia coli</i> IAI39                    | UPEC               |
| NC_011748        | 218693476 | <i>Escherichia coli</i> 55989                    | EAEC               |
| NC_016902        | 378710836 | <i>Escherichia coli</i> KO11                     | Laboratory         |
| NZ_CM000662      | 224514698 | <i>Escherichia coli</i> O157:H7 str. TW14588     | EHEC               |
| NC_000913        | 49175990  | <i>Escherichia coli</i> str. K-12 substr. MG1655 | Laboratory         |
| NC_013353        | 260842239 | <i>Escherichia coli</i> O103:H2 str. 12009       | EHEC               |
| NC_013361        | 260853213 | <i>Escherichia coli</i> O26:H11 str. 11368       | EHEC               |
| NC_013364        | 260866153 | <i>Escherichia coli</i> O111:H- str. 11128       | EHEC               |
| NC_013941        | 291280824 | <i>Escherichia coli</i> O55:H7 str. CB9615       | EPEC               |
| NC_002695        | 15829254  | <i>Escherichia coli</i> O157:H7 str. Sakai       | EHEC               |
| NC_002655        | 16445223  | <i>Escherichia coli</i> O157:H7 EDL933           | EHEC               |
| NC_004431        | 26245917  | <i>Escherichia coli</i> CFT073                   | UPEC               |
| NC_009800        | 157159467 | <i>Escherichia coli</i> HS                       | Commensal          |
| NC_009801        | 157154711 | <i>Escherichia coli</i> E24377A                  | ETEC               |
| NC_008253        | 110640213 | <i>Escherichia coli</i> 536                      | UPEC               |
| NC_007946        | 91209055  | <i>Escherichia coli</i> UTI89                    | UPEC               |
| NC_012759        | 238899406 | <i>Escherichia coli</i> BW2952                   | Laboratory         |
| NC_011415        | 209917191 | <i>Escherichia coli</i> SE11                     | Commensal          |
| NC_011742        | 218556939 | <i>Escherichia coli</i> S88                      | ExPEC - Meningitis |
| NC_011751        | 218703261 | <i>Escherichia coli</i> UMN026                   | UPEC               |
| AP009048         | 85674274  | <i>Escherichia coli</i> str. K12 substr. W3110   | Laboratory         |
| AP009378         | 281177210 | <i>Escherichia coli</i> SE15                     | Commensal          |
| AM946981         | 313848522 | <i>Escherichia coli</i> BL21(DE3)                | Laboratory         |
| CP001637         | 260447279 | <i>Escherichia coli</i> DH1                      | Laboratory         |
| CU651637         | 222031834 | <i>Escherichia coli</i> LF82                     | AIEC               |
| CP001671         | 307551844 | <i>Escherichia coli</i> ABU 83972                | Commensal          |
| FN554766         | 284919779 | <i>Escherichia coli</i> 042                      | EAEC               |
| CP001855         | 312944605 | <i>Escherichia coli</i> O83:H1 str. NRG 857C     | AIEC               |

|          |           |                                             |                       |
|----------|-----------|---------------------------------------------|-----------------------|
| CP002729 | 332341332 | <i>Escherichia coli</i> UMNK88              | porcine<br>EPEC       |
| FN649414 | 309700213 | <i>Escherichia coli</i> ETEC H10407         | EPEC                  |
| CP001969 | 294489418 | <i>Escherichia coli</i> IHE3034             | ExPEC -<br>Meningitis |
| CP002167 | 307625127 | <i>Escherichia coli</i> UM146               | AIEC                  |
| CP002211 | 355418401 | <i>Escherichia coli</i> str. 'clone D i2'   | UPEC                  |
| CP002212 | 355423321 | <i>Escherichia coli</i> str. 'clone D i14'  | UPEC                  |
| AP012030 | 315134697 | <i>Escherichia coli</i> DH1 (ME8569)        | Laboratory            |
| CP002291 | 383101383 | <i>Escherichia coli</i> P12b                | Laboratory            |
| CP002967 | 383403426 | <i>Escherichia coli</i> W                   | Laboratory            |
| CP003034 | 349736152 | <i>Escherichia coli</i> O7:K1 str. CE10     | ExPEC -<br>Meningitis |
| CP002797 | 333968017 | <i>Escherichia coli</i> NA114               | UPEC                  |
| CP003109 | 374356928 | <i>Escherichia coli</i> O55:H7 str. RM12579 | EPEC                  |

**Table S4. SNPs unique to 95NR1 and 95JB1**

| <b>Strain</b> | <b>11128 site</b>    | <b>Base change</b> | <b>Amino acid change</b>                       | <b>11128 gene number</b> | <b>Annotation</b>                                         |
|---------------|----------------------|--------------------|------------------------------------------------|--------------------------|-----------------------------------------------------------|
| 95JB1         | 586018               | c-t                | P-L                                            | ECO111_0546              | <i>glxK</i> (glycerate kinase II)                         |
| 95NR1         | 1633365<br>(3328268) | t-g                | Synonymous                                     | ECO111_1622              | putative tail length tape measure protein                 |
| 95JB1         | 3316686              | g-t                | V-F                                            | -                        | End of P16 prophage                                       |
| 95JB1         | 3678749              | g-a                | E-K                                            | ECO111_3690              | <i>metK</i> (methionine adenosyltransferase 1)            |
| 95JB1         | 3892698              | g-c                | Stop codon-<br>Y (but next codon is also stop) | ECO111_3903              | <i>fadH</i> (2,4-dienoyl-CoA reductase)                   |
| 95JB1         | 35489<br>(pO111_3)   | g-c                | P-A                                            | ECO111_p3-43             | pseudogene (conserved predicted protein, N-terminal part) |

**Table S5. Genes outside of annotated prophages of 11128 to which reads of 95NR1 and 95JB1 do not align.**

| <b>11128 gene number</b> | <b>Annotation</b>           | <b>BLAST-p</b>                                                                                                                 |                                                | <b>Description</b>                                               |
|--------------------------|-----------------------------|--------------------------------------------------------------------------------------------------------------------------------|------------------------------------------------|------------------------------------------------------------------|
| ECO111_0321              | Hypothetical protein        | Hypothetical protein                                                                                                           | No Pfam-A match                                | IE01 (end)                                                       |
| 0322                     | Hypothetical protein        | Hypothetical protein, plasmid pRiA4b ORF-3 like protein                                                                        | PRiA4_ORF3 (Plasmid pRiA4b ORF-3-like protein) |                                                                  |
| 0323                     | Hypothetical protein        | Hypothetical protein, putative phage protein                                                                                   | No Pfam-A match                                |                                                                  |
| 0324                     | Hypothetical protein        | Hypothetical, prophage protein                                                                                                 | No Pfam-A match                                |                                                                  |
| 0325                     | Hypothetical protein        | Hypothetical protein, putative prophage protein                                                                                | No Pfam-A match                                |                                                                  |
| 0326                     | Hypothetical protein        | Hypothetical protein, putative prophage protein                                                                                | No Pfam-A match                                |                                                                  |
| 0327                     | Hypothetical protein        | Hypothetical protein                                                                                                           | No Pfam-A match                                |                                                                  |
| 0328                     | Hypothetical protein        | Hypothetical protein                                                                                                           | No Pfam-A match                                |                                                                  |
| 0880                     | Hypothetical protein        | Hypothetical protein                                                                                                           | No Pfam-A match                                | Region in 12009 and 11128 only in the NCBI nucleotide collection |
| 0881                     | Predicted methyltransferase | Methyltransferase, modification methylase, DNA methylase N-4/N-6 domain containing protein, restriction endonuclease M subunit | N6_N4_Mtase (DNA methylase)                    |                                                                  |
| 0882                     | Site specific recombinase   | Hypothetical protein, site                                                                                                     | Resolvase (resolvase, N                        |                                                                  |

|      |                                        |                                                                                                                           |                                                       |      |
|------|----------------------------------------|---------------------------------------------------------------------------------------------------------------------------|-------------------------------------------------------|------|
|      |                                        | specific recombinase, resolvase                                                                                           | terminal domain)                                      |      |
| 0883 | Endonuclease-like protein              | Endonuclease, HNH endonuclease                                                                                            | HNH (HNH endonuclease)                                |      |
| 0884 | Hypothetical protein                   | Hypothetical protein                                                                                                      | No Pfam-A match                                       |      |
| 0885 | Putative transcriptional regulator     | Transcriptional regulator, DNA-binding protein, XRE family transcriptional regulator                                      | HTH 31 (helix-turn-helix domain)                      |      |
| 0886 | Hypothetical protein                   | Hypothetical protein                                                                                                      | No Pfam-A match                                       |      |
| 0887 | Hypothetical protein                   | Hypothetical protein, resolvase                                                                                           | No Pfam-A match                                       |      |
| 1286 | Hypothetical protein                   | Hypothetical protein, transcriptional regulator, parB-like nuclease domain protein, immunoglobulin-binding regulator IbrB | ParBc (ParB-like nuclease domain)                     | IE02 |
| 1287 | Transcriptional regulator PchD-homolog | Hypothetical protein, transcriptional regulator, perC transcriptional activator family protein                            | PerC (PerC transcriptional activator)                 |      |
| 1288 | Hypothetical protein                   | Hypothetical protein                                                                                                      | No Pfam-A match                                       |      |
| 1289 | Conserved predicted protein            | Hypothetical protein                                                                                                      | No Pfam-A match                                       |      |
| 1290 | Putative IS629 transposase             | IS629 transposase OrfB, transposase IS629, integrase core domain protein                                                  | HTH 21 (HTH-like domain), rve (integrase core domain) |      |

|      |                                                               |                                                                                                   |                                                                                       |                                                                       |
|------|---------------------------------------------------------------|---------------------------------------------------------------------------------------------------|---------------------------------------------------------------------------------------|-----------------------------------------------------------------------|
| 1291 | Hypothetical protein                                          | Hypothetical protein                                                                              | No Pfam-A match                                                                       |                                                                       |
| 1292 | Putative membrane transport protein                           | Hypothetical protein, membrane transport protein, major facilitator superfamily transport protein | MFS 1 (major facilitator family protein)                                              |                                                                       |
| 1293 | Siderophore biosynthesis protein ( <i>iucA</i> )              | IucA protein, Aerobactin siderophore biosynthesis protein, siderophore biosynthesis protein       | IucA_IucC (IucC/IucA family protein), FhuF (Ferric iron reductase FhuF-like protein)  |                                                                       |
| 1294 | Siderophore biosynthesis protein ( <i>iucB</i> )              | IucB, N(6)-hydroxylysine O-acetyltransferase                                                      | Acetyltransf_8 (Acetyltransferase [GNAT] domain)                                      |                                                                       |
| 1295 | Siderophore biosynthesis protein ( <i>iucC</i> )              | IucC, Aerobactin siderophore biosynthesis protein, siderophore biosynthesis protein               | IucA_IucC (IucC/IucA family protein), FhuF (Ferric iron reductase FhuF-like protein)  |                                                                       |
| 1296 | Siderophore biosynthesis protein ( <i>iucD</i> )              | Siderophore biosynthesis protein, IucD, lysine 6-monooxygenase, lysine:N6-hydroxylase             | K_oxygenase (L-lysine 6-monooxygenase [NADPH-requiring])                              |                                                                       |
| 1297 | Putative ferric siderophore receptor ( <i>iutA</i> )          | IutA, ligand-gated channel protein                                                                | Plug (TonB-dependent Receptor Plug Domain)<br>TonB_Dep_Rec, (TonB dependent receptor) |                                                                       |
| 2137 | Conserved hypothetical protein ( <i>ydhS</i> ) [half deleted] | Hypothetical protein                                                                              | NAD_binding_9 (FAD-NAD[P]-binding)                                                    | Region found in multiple <i>E. coli</i> in NCBI nucleotide collection |



|      |                                                          |                                                                                                                                              |                                            |  |
|------|----------------------------------------------------------|----------------------------------------------------------------------------------------------------------------------------------------------|--------------------------------------------|--|
| 2138 | Conserved hypothetical ( <i>ydhT</i> )                   | Hypothetical protein                                                                                                                         | No Pfam-A match                            |  |
| 2139 | Predicted cytochrome ( <i>ydhU</i> )                     | Nickel-dependent hydrogenase b-type cytochrome subunit, thiosulfate reductase cytochrome B, prokaryotic cytochrome b561 family protein, PhsC | Ni_hydr_CYTB (prokaryotic cytochrome b561) |  |
| 2140 | Predicted 4Fe-4S ferridoxin-type protein ( <i>ydhX</i> ) |                                                                                                                                              |                                            |  |
| 2141 | Conserved predicted protein ( <i>ydhW</i> )              |                                                                                                                                              |                                            |  |

**Table S6. Identification of phage insertion sites of 95NR1 and 95JB1 and associated phage terminal regions using paired-end reads.**

| Location of the phage insertion site in relation to the 11128 reference genome | Location of the mate reads of the reads aligned to the 5' end of the phage insertion site | Location of the mate reads of the reads aligned to the 3' end of the phage insertion site |
|--------------------------------------------------------------------------------|-------------------------------------------------------------------------------------------|-------------------------------------------------------------------------------------------|
| ECO111_tRNA006: tRNA-Arg                                                       | ECO111_P01 (5' end)                                                                       | ECO111_P01 (3' end)                                                                       |
| Adjacent <i>ybhC</i> (0783)                                                    | ECO111_P02 (5' end)                                                                       | ECO111_P02 (3' end)                                                                       |
| Adjacent <i>yccA</i> (1038)                                                    | ECO111_P03 (5' end)                                                                       | ECO111_P03 (3' end)                                                                       |
| Adjacent <i>potC</i> (1401)                                                    | ECO111_P05 (5' end)                                                                       | ECO111_P05 (3' end)                                                                       |
| Adjacent <i>yefD</i> (1476)                                                    | O103:H2 str. 12009's ECO103_P04 (5' end)                                                  | O103:H2 str. 12009's ECO103_P04 (3' end)                                                  |
| Adjacent <i>yciI</i> (1579)                                                    | ECO111_P06 (5' end)                                                                       | ECO111_P06 (3' end)                                                                       |
| Adjacent <i>ydfJ</i> (1946)                                                    | ECO111_P08 (3' end)                                                                       | ECO111_P08 (5' end)                                                                       |
| Adjacent <i>tonB</i> (1986)                                                    | ECO111_P09 (3' end)                                                                       | ECO111_P09 (5' end)                                                                       |
| Adjacent <i>btuC</i> (2181)                                                    | ECO111_P10 (5' end)                                                                       | ECO111_P10 (3' end)                                                                       |
| Adjacent <i>pphA</i> (2346)                                                    | 11368 ECO26_P14 (3' end)                                                                  | 11368 ECO26_P14 (5' end)                                                                  |
| Adjacent <i>yobB</i> (2553)                                                    | ECO111_P12 (3' end)                                                                       | ECO111_P12 (5' end)                                                                       |
| <i>yfaT</i> (2981)                                                             | ECO111_P15 (3' end)                                                                       | ECO111_P15 (5' end)                                                                       |
| ECO111_tRNA056: tRNA-Arg                                                       | ECO103_P12 (3' end), VB_ECOP_24B(3' end), VT2phi_272(3' end)                              | ECO103_P12 (5' end), VT2phi_272(5' end)                                                   |
| tmRNA <i>ssrA</i> (adjacent 3340)                                              | ECO111_P16 (3' end)                                                                       | ECO111_P16 (5' end)                                                                       |
| Adjacent <i>yicC</i> (4466)                                                    | O103:H2 str. 12009's ECO103_P14 (5' end)                                                  | O103:H2 str. 12009's ECO103_P14 (3' end)                                                  |
| Hypothetical protein (4843)                                                    | Sakai phage (5' end)                                                                      | Sakai phage (3' end)                                                                      |
| <i>yjbN</i> (4923)                                                             | ECO111_P17 (5' end)                                                                       | ECO111_P17 (3' end)                                                                       |
| Hypothetical protein(5095) [95NR1 only]                                        | ECO103_P12 (5' end), VT2phi_272 (5' end)                                                  | VT2phi_272 (3' end)                                                                       |

## Genome References

1. **Creuzburg, K., J. Recktenwald, V. Kuhle, S. Herold, M. Hensel, and H. Schmidt.** 2005. The Shiga toxin 1-converting bacteriophage BP-4795 encodes an NleA-like type III effector protein. *J Bacteriol* **187**:8494-8498.
2. **Hayashi, T., K. Makino, M. Ohnishi, K. Kurokawa, K. Ishii, K. Yokoyama, C. G. Han, E. Ohtsubo, K. Nakayama, T. Murata, M. Tanaka, T. Tobe, T. Iida, H. Takami, T. Honda, C. Sasakawa, N. Ogasawara, T. Yasunaga, S. Kuhara, T. Shiba, M. Hattori, and H. Shinagawa.** 2001. Complete genome sequence of enterohemorrhagic *Escherichia coli* O157:H7 and genomic comparison with a laboratory strain K-12. *DNA Res* **8**:11-22.
3. **Kyle, J. L., C. A. Cummings, C. T. Parker, B. Quinones, P. Vatta, E. Newton, S. Huynh, M. Swimley, L. Degoricija, M. Barker, S. Fontanoz, K. Nguyen, R. Patel, R. Fang, R. Tebbs, O. Petrauskene, M. Furtado, and R. E. Mandrell.** 2012. *Escherichia coli* serotype O55:H7 diversity supports parallel acquisition of bacteriophage at Shiga toxin phage insertion sites during evolution of the O157:H7 lineage. *J Bacteriol* **194**:1885-1896.
4. **L'Abée-Lund, T. M., H. J. Jorgensen, K. O'Sullivan, J. Bohlin, G. Ligard, P. E. Granum, and T. Lindback.** 2012. The highly virulent 2006 Norwegian EHEC O103:H25 outbreak strain is related to the 2011 German O104:H4 outbreak strain. *PLoS One* **7**:e31413.
5. **Morgan, G. J., G. F. Hatfull, S. Casjens, and R. W. Hendrix.** 2002. Bacteriophage Mu genome sequence: analysis and comparison with Mu-like prophages in *Haemophilus*, *Neisseria* and *Deinococcus*. *J Mol Biol* **317**:337-359.
6. **Ogura, Y., T. Ooka, A. Iguchi, H. Toh, M. Asadulghani, K. Oshima, T. Kodama, H. Abe, K. Nakayama, K. Kurokawa, T. Tobe, M. Hattori, and T. Hayashi.** 2009. Comparative genomics reveal the mechanism of the parallel evolution of O157 and non-O157 enterohemorrhagic *Escherichia coli*. *Proc Natl Acad Sci U S A* **106**:17939-17944.
7. **Petty, N. K., R. Bulgin, V. F. Crepin, A. M. Cerdeno-Tarraga, G. N. Schroeder, M. A. Quail, N. Lennard, C. Corton, A. Barron, L. Clark, A. L. Toribio, J. Parkhill, G. Dougan, G. Frankel, and N. R. Thomson.** 2010. The *Citrobacter rodentium* genome sequence reveals convergent evolution with human pathogenic *Escherichia coli*. *J Bacteriol* **192**:525-538.
8. **Sato, T., T. Shimizu, M. Watarai, M. Kobayashi, S. Kano, T. Hamabata, Y. Takeda, and S. Yamasaki.** 2003. Genome analysis of a novel Shiga toxin 1 (Stx1)-converting phage which is closely related to Stx2-converting phages but not to other Stx1-converting phages. *J Bacteriol* **185**:3966-3971.
9. **Smith, D. L., D. J. Rooks, P. C. Fogg, A. C. Darby, N. R. Thomson, A. J. McCarthy, and H. E. Allison.** 2012. Comparative genomics of Shiga toxin encoding bacteriophages. *BMC Genomics* **13**:311.
10. **Su, L. K., C. P. Lu, Y. Wang, D. M. Cao, J. H. Sun, and Y. X. Yan.** 2010. [Lysogenic infection of a Shiga toxin 2-converting bacteriophage changes host gene expression, enhances host acid resistance and motility]. *Mol Biol (Mosk)* **44**:60-73.
11. **Xiong, Y., P. Wang, R. Lan, C. Ye, H. Wang, J. Ren, H. Jing, Y. Wang, Z. Zhou, X. Bai, Z. Cui, X. Luo, A. Zhao, S. Zhang, H. Sun, L. Wang, and J. Xu.** 2012. A novel *Escherichia coli* O157:H7 clone causing a major hemolytic uremic syndrome outbreak in China. *PLoS One* **7**:e36144.

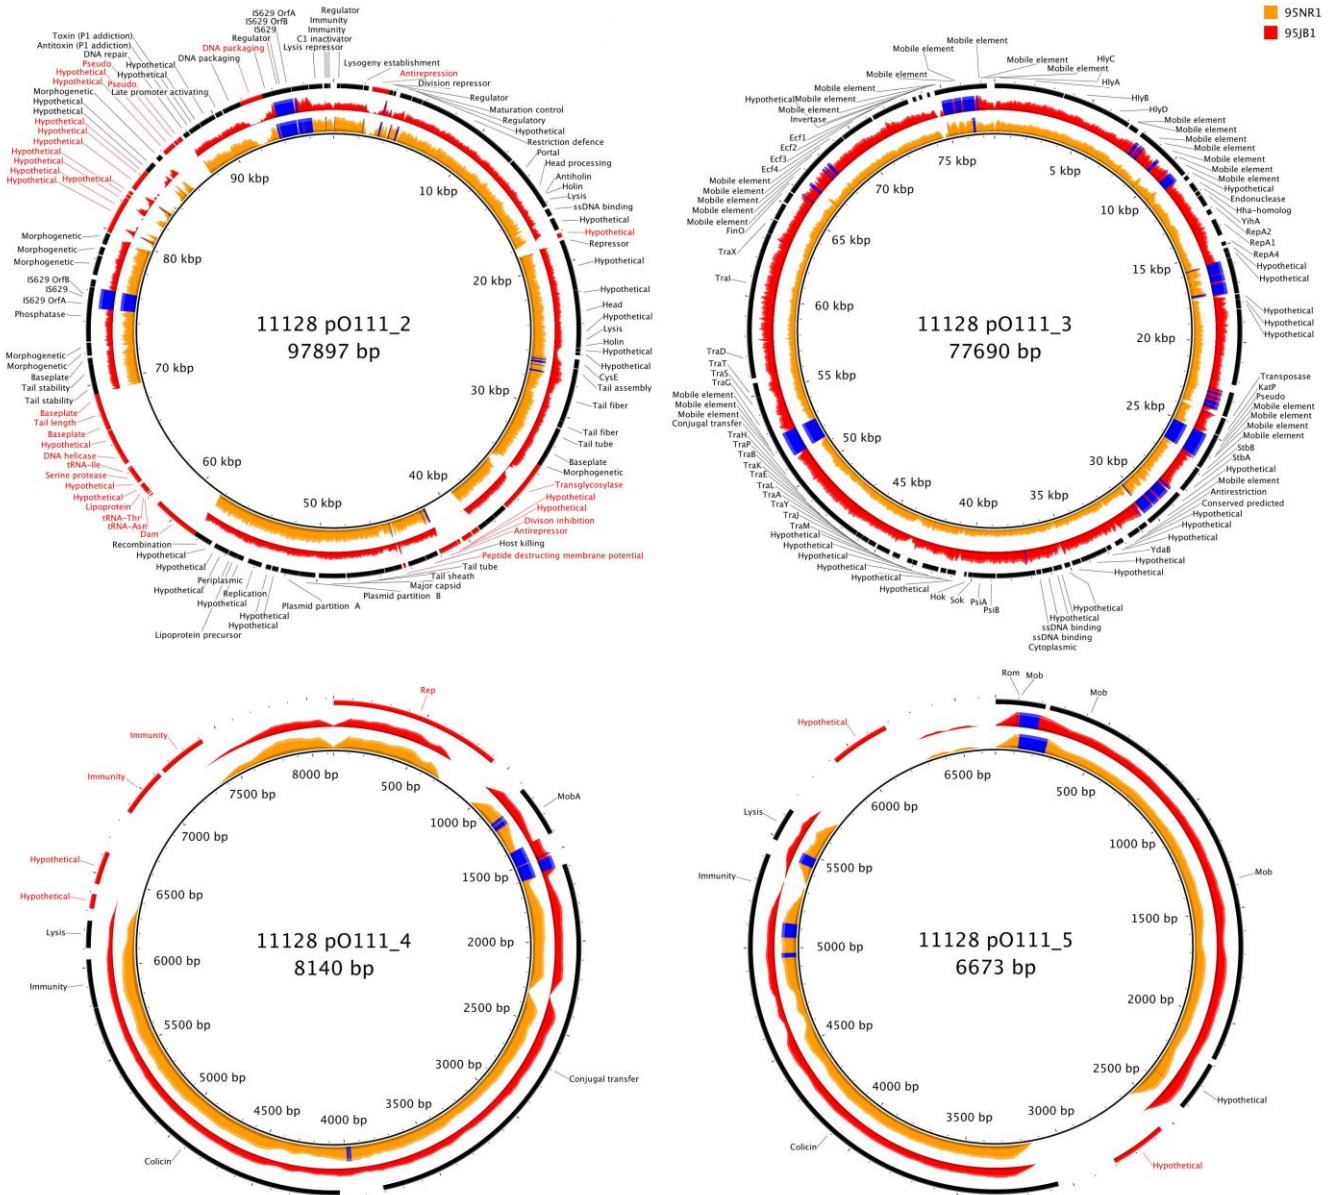

**Figure S1. Mapping of 95NR1 and 95JB1 reads to plasmids p0111\_2 - p0111\_5 of 11128.** Reads of 95NR1 and 95JB1 were aligned to the plasmids using Bowtie2. The inner (orange) rings represent 95NR1 coverage and the outer (red) rings represent 95JB1 coverage. Areas of high coverage are shown in royal blue. Genes without alignment are annotated in red.

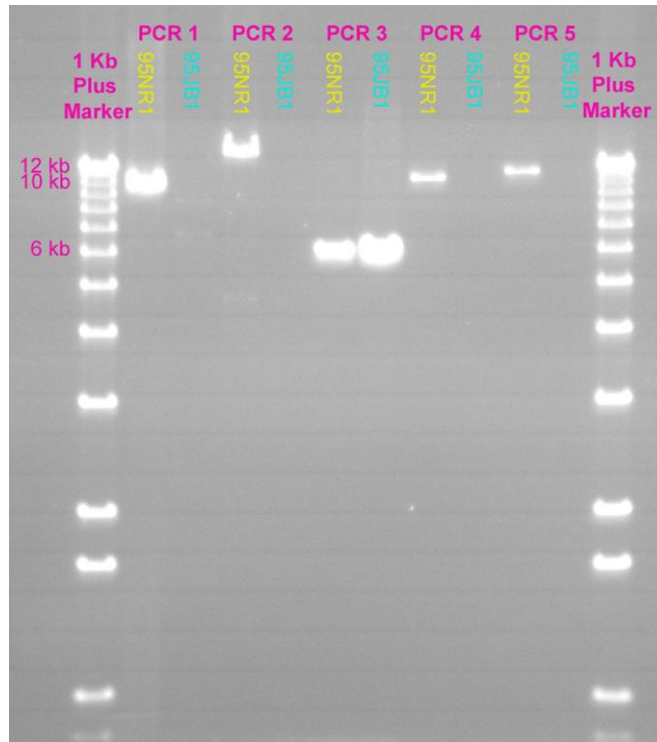

**Figure S2. Stx2-converting phage PCRs of this study.**

PCRs were performed using 95NR1 and 95JB1 genomic DNA with the following primers:

PCR 1: 95NR1 contig213000000 F and R

PCR 2: Tail fiber F and Hypothetical R

PCR 3: Stx2 phage 1 cI F and Stx2A R

PCR 4: Stx2 phage 2 cI F and Stx2A R

PCR 4: Stx2 phage 3 cI F and Stx2A R

Samples were electrophoresed with 1 Kb Plus DNA Ladder (Life Technologies, Victoria, Australia) on a 0.8% agarose gel in TBE for 6 hours at 60 V and post-stained using GelRed Nucleic Acid Gel Stain (Biotium, California, USA).
